# Supplementary material for: Donor–acceptor meso-alkynylated ferrocenyl BODIPYs: synthesis, structure, and properties
Source: Royal Society of Chemistry journal article supplement (doi:10.1039/c3dt51374b), 2013-01-01
Supplement: c3dt51374b.pdf [file c3dt51374b.pdf]

## Supporting Information

# Donor-Acceptor *meso*-Alkynylated Ferrocenyl BODIPYs: Synthesis, Structure, and Properties

*Rajneesh Misra,\* Bhausheb Dhokale, Thaksen Jadhav, and Shaikh M. Mobin*

*Department of Chemistry,  
Indian Institute of Technology Indore,  
Indore- 452 017, India.*

## Table of Contents

|             |                                                                                                    |            |
|-------------|----------------------------------------------------------------------------------------------------|------------|
| <b>I.</b>   | <b>Crystallographic data</b> .....                                                                 | <b>S3</b>  |
| <b>II.</b>  | <b>Photophysical Data</b> .....                                                                    | <b>S5</b>  |
| <b>III.</b> | <b>Electrochemical Data</b> .....                                                                  | <b>S7</b>  |
| <b>IV.</b>  | <b>Theoretical Calculations</b> .....                                                              | <b>S9</b>  |
| <b>V.</b>   | <b>Copies of <sup>1</sup>H NMR, <sup>13</sup>C NMR and HRMS Spectra of the New Compounds</b> ..... | <b>S19</b> |
|             | <b>References</b> .....                                                                            | <b>S25</b> |

### Single Crystal X-ray Diffraction Studies.

Single crystal X-ray structural studies of **2'**, **3** and **6** were performed on a CCD Agilent Technologies (Oxford Diffraction) SUPER NOVA diffractometer. Data were collected at 293(2) K using graphite-monochromated Mo K $\alpha$  radiation ( $\lambda_{\alpha} = 0.71073 \text{ \AA}$ ). The strategy for the Data collection was evaluated by using the CrysAlisPro CCD software. The data were collected by the standard 'phi-omega scan techniques, and were scaled and reduced using CrysAlisPro RED software. The structures were solved by direct methods using SHELXS-97, and refined by full matrix least-squares with SHELXL-97, refining on  $F^2$ .<sup>1</sup> The positions of all the atoms were obtained by direct methods. All non-hydrogen atoms were refined anisotropically. The remaining hydrogen atoms were placed in geometrically constrained positions, and refined with isotropic temperature factors, generally  $1.2U_{eq}$  of their parent atoms. The crystal, and refinement data are summarized in Table 1. The CCDC numbers 934137, 934138, and 934139 contain the supplementary crystallographic data for **2'**, **3**, and **6** respectively. These data can be obtained free of charge via [www.ccdc.cam.ac.uk/conts/retrieving.html](http://www.ccdc.cam.ac.uk/conts/retrieving.html) (or from the Cambridge Crystallographic Data Centre, 12 union Road, Cambridge CB21 EZ, UK; Fax: (+44) 1223-336-033; or [deposit@ccdc.cam.ac.uk](mailto:deposit@ccdc.cam.ac.uk)).

S4

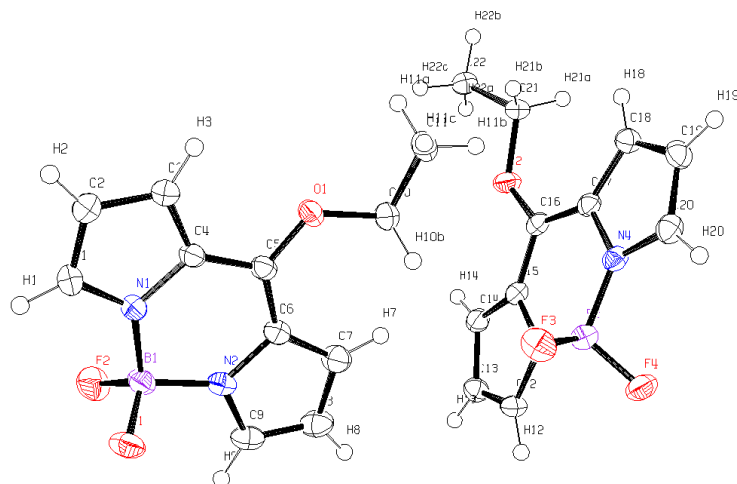

**Figure S1.** ORTEP view of **2'** showing the atom-labeling scheme. Thermal ellipsoids are plotted at the 50 % level.

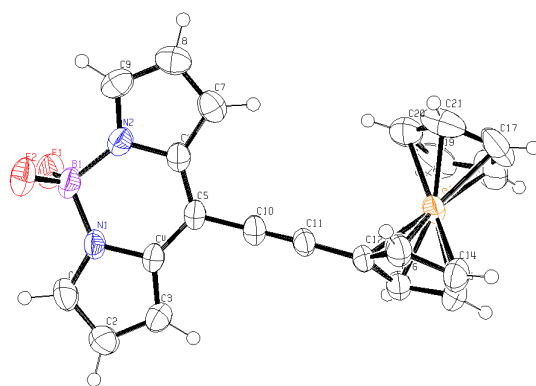

**Figure S2.** ORTEP view of **3** showing the atom-labeling scheme. Thermal ellipsoids are plotted at the 50 % level.

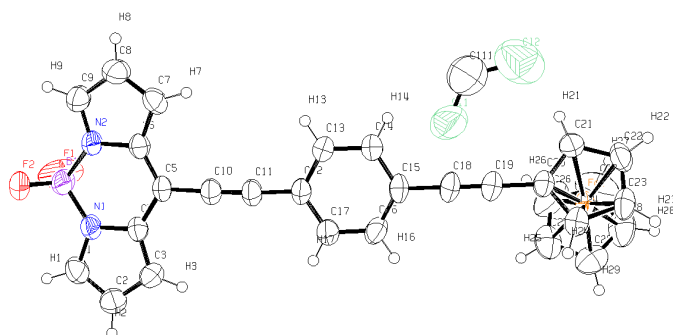

**Figure S3.** ORTEP view of **6** showing the atom-labeling scheme. Thermal ellipsoids are plotted at the 50 % level.

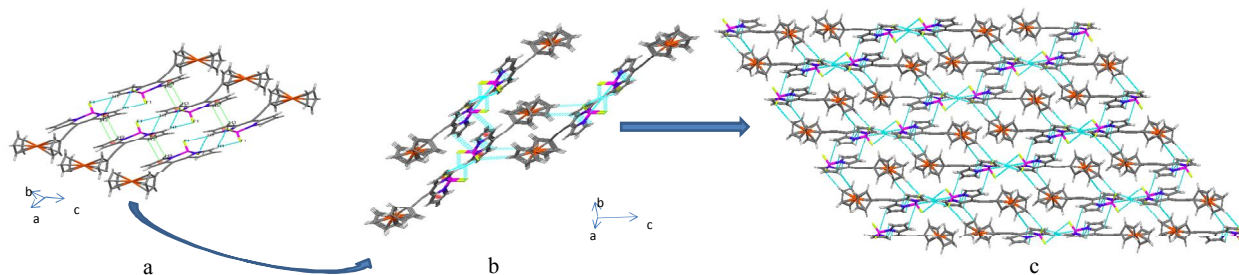

**Figure S4.** Supramolecular interactions in the crystal structure of **3**

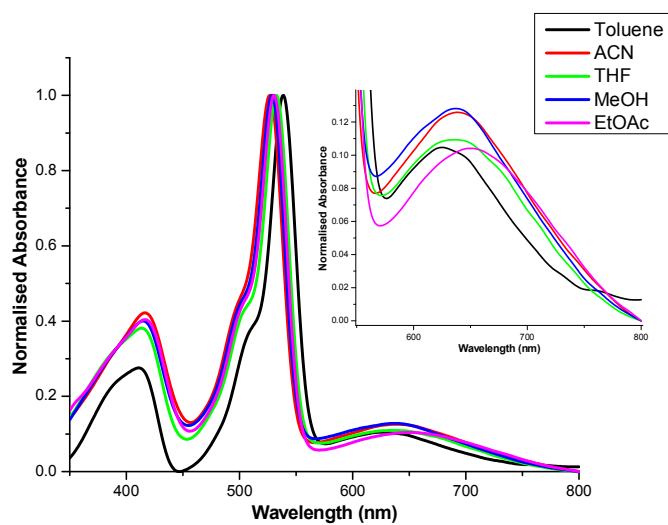

**Figure S5-** Positive solvatochromism in compound **3**

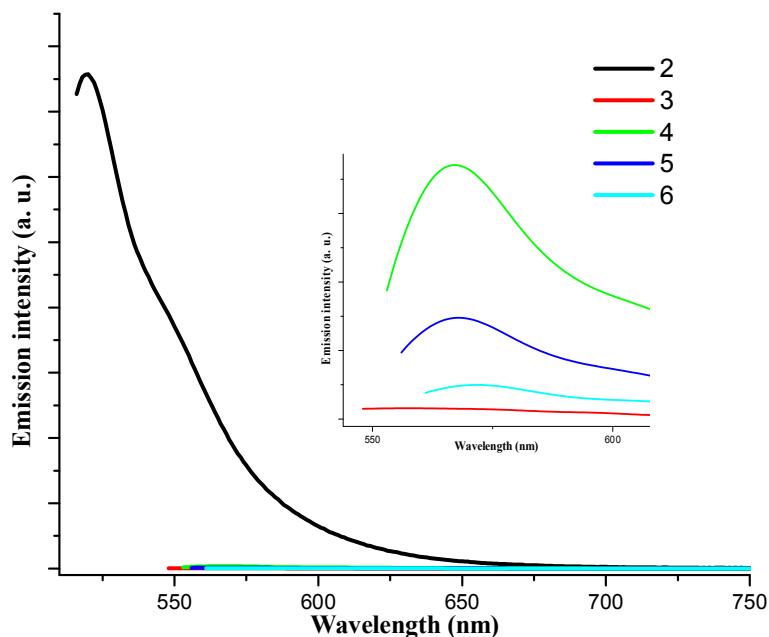

**Figure S6.** Emission Spectra of **2-6** recorded in toluene, inset shows enlarged view (Excited at respective  $\lambda_{S_0 \rightarrow S_1}$  at concentration of 0.1 absorbance)

***The fluorescence quantum yields ( $\phi_F$ )***

The fluorescence quantum yields ( $\phi_F$ ) of compounds **2-6** were calculated by the steady-state comparative method using Rhodamine 6G as a standard ( $\phi_{st} = 0.88$ , ethanol).<sup>i</sup>

$$\phi_F = \phi_{st} \times S_u / S_{st} \times A_{st} / A_u \times n_{Du}^2 / n_{Dst}^2 \dots \dots \dots \text{(Eq. 1)}$$

Where  $\phi_F$  is the emission quantum yield of the sample,  $\phi_{st}$  is the emission quantum yield of the standard,  $A_{st}$  and  $A_u$  represent the absorbance of the standard and sample at the excitation wavelength, respectively, while  $S_{st}$  and  $S_u$  are the integrated emission band

areas of the standard and sample, respectively, and  $n_{\text{Dst}}$  and  $n_{\text{Du}}$  the solvent refractive index of the standard and sample, u and st refer to the unknown and standard, respectively.

### Electrochemical Characterizations

Electrochemical characterization of all compounds was done by cyclic voltammetry (CV) and Differential pulse voltammetry (DPV). Voltamograms were recorded on a CHI620D electrochemical analyzer using glassy carbon as working electrode, Pt wire as the counter electrode, and saturated calomel electrode as the reference electrode (SCE). The scan speed was  $100 \text{ mVS}^{-1}$ . A solution of tetrabutylammonium- hexafluorophosphate (TBAPF<sub>6</sub>) in CH<sub>2</sub>Cl<sub>2</sub> (0.1 M) was employed as the supporting electrolyte. CH<sub>2</sub>Cl<sub>2</sub> was freshly distilled from CaH<sub>2</sub> prior to use. The half-wave oxidation potential of Ferrocene was measured to be 0.38 V against SCE.

#### a) Cyclic voltammogram of 2

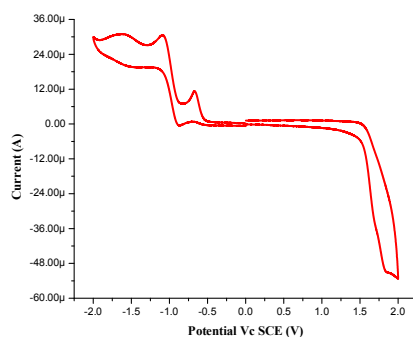

#### b) Cyclic voltammogram of 4

S8

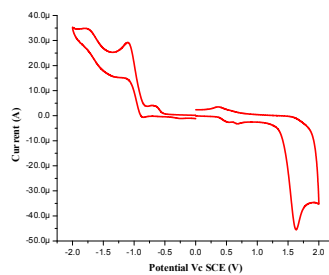

c) Cyclic voltammogram of 5

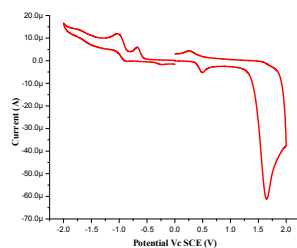

d) Cyclic voltammogram of 6

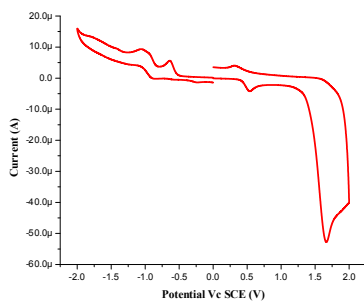

e) Representative DPV of the ferrocenyl BODIPY 3

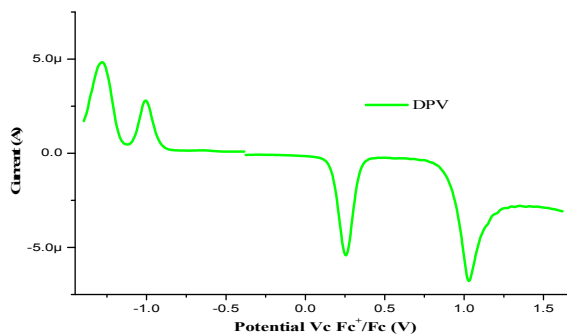

f)



**DFT calculations<sup>ii</sup>**

| Molecule                                                                                       | HOMO-1                                                                              | HOMO                                                                                | LUMO                                                                                 | LUMO+1                                                                                |
|------------------------------------------------------------------------------------------------|-------------------------------------------------------------------------------------|-------------------------------------------------------------------------------------|--------------------------------------------------------------------------------------|---------------------------------------------------------------------------------------|
| 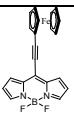<br><b>3</b>  |    |    |    |    |
| <br><b>4</b>  |    |    |    |    |
| <br><b>5</b>  |    |    |    |    |
| <br><b>6</b> |  |  |  |  |

**Figure S2-** HOMO-1, HOMO, and LUMO, and LUMO+1 frontier orbitals of BODIPYs at the B3LYP/6-31+G\*\* for C, N, B, F, H, and Lanl2DZ for Fe level

**DFT Calculations.**

Calculation method: B3LYP/6-31+G\*\* for C, H, N, S, and Lanl2DZ for Fe with Gaussian 09<sup>iii</sup>

DFT Data for BODIPY 3

Standard orientation:

| -----  |        |        |                         |   |   |  |
|--------|--------|--------|-------------------------|---|---|--|
| Center | Atomic | Atomic | Coordinates (Angstroms) |   |   |  |
| Number | Number | Type   | X                       | Y | Z |  |
| -----  |        |        |                         |   |   |  |

S10

|    |    |   |           |           |           |
|----|----|---|-----------|-----------|-----------|
| 1  | 6  | 0 | 2.081004  | -2.566490 | -0.226135 |
| 2  | 1  | 0 | 1.066736  | -2.867356 | -0.446763 |
| 3  | 6  | 0 | 3.171650  | -3.379297 | 0.061890  |
| 4  | 1  | 0 | 3.192740  | -4.458464 | 0.114941  |
| 5  | 6  | 0 | 4.268703  | -2.521718 | 0.280219  |
| 6  | 1  | 0 | 5.291992  | -2.768931 | 0.527273  |
| 7  | 7  | 0 | 3.892986  | -1.239350 | 0.139127  |
| 8  | 5  | 0 | 4.834897  | 0.011526  | 0.244903  |
| 9  | 6  | 0 | 3.145510  | 3.382381  | -0.040439 |
| 10 | 6  | 0 | 2.061350  | 2.552902  | -0.304533 |
| 11 | 1  | 0 | 1.044713  | 2.839104  | -0.533699 |
| 12 | 6  | 0 | 2.530316  | 1.219971  | -0.213465 |
| 13 | 6  | 0 | 1.850523  | -0.009079 | -0.360629 |
| 14 | 6  | 0 | 2.539541  | -1.227818 | -0.174822 |
| 15 | 7  | 0 | 3.883503  | 1.251375  | 0.100205  |
| 16 | 9  | 0 | 5.458636  | 0.033188  | 1.478060  |
| 17 | 6  | 0 | 4.249097  | 2.540226  | 0.203593  |
| 18 | 1  | 0 | 5.270207  | 2.802539  | 0.444001  |
| 19 | 9  | 0 | 5.752274  | -0.001146 | -0.789959 |
| 20 | 1  | 0 | 3.158173  | 4.462769  | -0.019154 |
| 21 | 6  | 0 | 0.474879  | -0.020125 | -0.677081 |
| 22 | 6  | 0 | -0.711800 | -0.032976 | -0.955076 |
| 23 | 6  | 0 | -2.082949 | -0.053670 | -1.291906 |
| 24 | 26 | 0 | -3.671256 | -0.001193 | 0.047472  |
| 25 | 6  | 0 | -2.920990 | 1.093733  | -1.547638 |
| 26 | 6  | 0 | -2.908443 | -1.228486 | -1.442052 |

S11

|    |   |   |           |           |           |
|----|---|---|-----------|-----------|-----------|
| 27 | 6 | 0 | -4.223395 | 0.623785  | -1.866712 |
| 28 | 6 | 0 | -4.215715 | -0.803810 | -1.801945 |
| 29 | 6 | 0 | -2.931785 | 0.086268  | 1.990970  |
| 30 | 6 | 0 | -3.740618 | -1.077833 | 1.825326  |
| 31 | 6 | 0 | -5.053435 | -0.653002 | 1.456667  |
| 32 | 6 | 0 | -5.054019 | 0.772780  | 1.392645  |
| 33 | 6 | 0 | -3.741565 | 1.230229  | 1.721608  |
| 34 | 1 | 0 | -2.599574 | 2.124091  | -1.495579 |
| 35 | 1 | 0 | -2.575397 | -2.246005 | -1.296019 |
| 36 | 1 | 0 | -5.082202 | 1.243028  | -2.085546 |
| 37 | 1 | 0 | -5.067692 | -1.449550 | -1.962811 |
| 38 | 1 | 0 | -1.877058 | 0.097122  | 2.229934  |
| 39 | 1 | 0 | -3.409862 | -2.101516 | 1.933546  |
| 40 | 1 | 0 | -5.890812 | -1.299071 | 1.231472  |
| 41 | 1 | 0 | -5.892343 | 1.395308  | 1.111389  |
| 42 | 1 | 0 | -3.412193 | 2.259930  | 1.737074  |

---

Total Energy (HF) = -1266.865121 Hartree

DFT Data for BODIPY 4

Standard orientation:

-----

| Center | Atomic | Atomic | Coordinates (Angstroms) |          |          |
|--------|--------|--------|-------------------------|----------|----------|
| Number | Number | Type   | X                       | Y        | Z        |
| 1      | 6      | 0      | 4.629051                | 2.447532 | 0.518470 |
| 2      | 1      | 0      | 3.804939                | 3.145855 | 0.547670 |
| 3      | 6      | 0      | 5.977139                | 2.705379 | 0.735904 |

-----

S12

|    |   |   |           |           |           |
|----|---|---|-----------|-----------|-----------|
| 4  | 1 | 0 | 6.435923  | 3.654032  | 0.975360  |
| 5  | 6 | 0 | 6.654301  | 1.478431  | 0.578574  |
| 6  | 1 | 0 | 7.710217  | 1.263442  | 0.668929  |
| 7  | 7 | 0 | 5.783842  | 0.500720  | 0.277686  |
| 8  | 5 | 0 | 6.134279  | -1.018300 | 0.091042  |
| 9  | 6 | 0 | 3.277842  | -3.250298 | -0.987018 |
| 10 | 6 | 0 | 2.585300  | -2.062039 | -0.786981 |
| 11 | 1 | 0 | 1.527229  | -1.879901 | -0.909448 |
| 12 | 6 | 0 | 3.537874  | -1.090624 | -0.392565 |
| 13 | 6 | 0 | 3.387553  | 0.280656  | -0.093691 |
| 14 | 6 | 0 | 4.514716  | 1.065009  | 0.230782  |
| 15 | 7 | 0 | 4.789247  | -1.693422 | -0.355629 |
| 16 | 9 | 0 | 7.090476  | -1.167559 | -0.894831 |
| 17 | 6 | 0 | 4.633608  | -2.979823 | -0.709894 |
| 18 | 1 | 0 | 5.485689  | -3.644457 | -0.749199 |
| 19 | 9 | 0 | 6.553092  | -1.555228 | 1.294590  |
| 20 | 1 | 0 | 2.874625  | -4.203369 | -1.298263 |
| 21 | 6 | 0 | 2.104419  | 0.872416  | -0.134833 |
| 22 | 6 | 0 | 0.996838  | 1.378500  | -0.167744 |
| 23 | 6 | 0 | -0.297316 | 1.967461  | -0.205084 |
| 24 | 6 | 0 | -1.420371 | 1.182148  | -0.523009 |
| 25 | 6 | 0 | -0.467021 | 3.337199  | 0.086191  |
| 26 | 6 | 0 | -2.706907 | 1.735625  | -0.563003 |
| 27 | 1 | 0 | -1.280883 | 0.125297  | -0.722825 |
| 28 | 6 | 0 | -1.741547 | 3.891057  | 0.049210  |
| 29 | 1 | 0 | 0.397567  | 3.943362  | 0.334329  |

S13

|    |    |   |           |           |           |
|----|----|---|-----------|-----------|-----------|
| 30 | 6  | 0 | -2.848052 | 3.104740  | -0.276264 |
| 31 | 1  | 0 | -1.877481 | 4.946364  | 0.266021  |
| 32 | 1  | 0 | -3.832123 | 3.560039  | -0.326182 |
| 33 | 6  | 0 | -3.878718 | 0.914464  | -0.922879 |
| 34 | 26 | 0 | -4.665965 | -0.705580 | 0.134793  |
| 35 | 6  | 0 | -5.245174 | 1.165739  | -0.560028 |
| 36 | 6  | 0 | -3.872924 | -0.272898 | -1.732382 |
| 37 | 6  | 0 | -6.062656 | 0.154984  | -1.144215 |
| 38 | 6  | 0 | -5.214207 | -0.733321 | -1.870344 |
| 39 | 6  | 0 | -3.509104 | -1.028671 | 1.831223  |
| 40 | 6  | 0 | -3.530533 | -2.204633 | 1.021765  |
| 41 | 6  | 0 | -4.888200 | -2.628682 | 0.895098  |
| 42 | 6  | 0 | -5.705357 | -1.714947 | 1.626649  |
| 43 | 6  | 0 | -4.852988 | -0.726080 | 2.205508  |
| 44 | 1  | 0 | -5.592057 | 1.961897  | 0.084116  |
| 45 | 1  | 0 | -2.998358 | -0.735012 | -2.169008 |
| 46 | 1  | 0 | -7.132695 | 0.057250  | -1.024209 |
| 47 | 1  | 0 | -5.527931 | -1.617218 | -2.408193 |
| 48 | 1  | 0 | -2.633377 | -0.444986 | 2.080299  |
| 49 | 1  | 0 | -2.672777 | -2.676298 | 0.562078  |
| 50 | 1  | 0 | -5.238582 | -3.474234 | 0.319270  |
| 51 | 1  | 0 | -6.783565 | -1.747769 | 1.702389  |
| 52 | 1  | 0 | -5.171796 | 0.120334  | 2.798156  |

---

Total Energy (HF) = -1497.9228397 Hartree

DFT Data of BODIPY 5

Standard orientation:

---

| Center | Atomic | Atomic | Coordinates (Angstroms) |           |           |
|--------|--------|--------|-------------------------|-----------|-----------|
| Number | Number | Type   | X                       | Y         | Z         |
| 1      | 6      | 0      | -4.427746               | -2.554191 | 0.248189  |
| 2      | 1      | 0      | -3.411453               | -2.907499 | 0.147927  |
| 3      | 6      | 0      | -5.576038               | -3.304721 | 0.473246  |
| 4      | 1      | 0      | -5.649618               | -4.376527 | 0.590040  |
| 5      | 6      | 0      | -6.652126               | -2.394988 | 0.515173  |
| 6      | 1      | 0      | -7.704821               | -2.586242 | 0.671722  |
| 7      | 7      | 0      | -6.209356               | -1.140716 | 0.326100  |
| 8      | 5      | 0      | -7.080348               | 0.163209  | 0.389693  |
| 9      | 6      | 0      | -5.317087               | 3.369589  | -0.562869 |
| 10     | 6      | 0      | -4.231473               | 2.501676  | -0.535664 |
| 11     | 1      | 0      | -3.192820               | 2.729483  | -0.728076 |
| 12     | 6      | 0      | -4.737746               | 1.217894  | -0.217279 |
| 13     | 6      | 0      | -4.085270               | -0.029454 | -0.103605 |
| 14     | 6      | 0      | -4.831812               | -1.199966 | 0.155170  |
| 15     | 7      | 0      | -6.113781               | 1.317612  | -0.052692 |
| 16     | 9      | 0      | -8.142846               | 0.069255  | -0.488520 |
| 17     | 6      | 0      | -6.458286               | 2.599670  | -0.259278 |
| 18     | 1      | 0      | -7.491720               | 2.908394  | -0.181871 |
| 19     | 9      | 0      | -7.507452               | 0.379466  | 1.687644  |
| 20     | 1      | 0      | -5.308219               | 4.428412  | -0.778853 |

---

S15

|    |    |   |           |           |           |
|----|----|---|-----------|-----------|-----------|
| 21 | 6  | 0 | -2.685617 | -0.109942 | -0.270554 |
| 22 | 6  | 0 | -1.476551 | -0.180381 | -0.410324 |
| 23 | 6  | 0 | -0.070406 | -0.263620 | -0.574872 |
| 24 | 6  | 0 | 0.705137  | 0.899640  | -0.771805 |
| 25 | 6  | 0 | 0.587115  | -1.510992 | -0.550265 |
| 26 | 6  | 0 | 2.079340  | 0.812633  | -0.932402 |
| 27 | 1  | 0 | 0.213755  | 1.867051  | -0.790506 |
| 28 | 6  | 0 | 1.962330  | -1.587523 | -0.720314 |
| 29 | 1  | 0 | 0.004295  | -2.415307 | -0.408434 |
| 30 | 6  | 0 | 2.741925  | -0.430802 | -0.909914 |
| 31 | 1  | 0 | 2.655416  | 1.722820  | -1.063928 |
| 32 | 1  | 0 | 2.440808  | -2.561405 | -0.725523 |
| 33 | 6  | 0 | 4.196157  | -0.526884 | -1.108479 |
| 34 | 26 | 0 | 5.698692  | 0.084256  | 0.211057  |
| 35 | 6  | 0 | 5.039591  | -1.634928 | -0.751196 |
| 36 | 6  | 0 | 5.044890  | 0.460853  | -1.720093 |
| 37 | 6  | 0 | 6.373801  | -1.337324 | -1.150782 |
| 38 | 6  | 0 | 6.376331  | -0.042993 | -1.751908 |
| 39 | 6  | 0 | 4.823120  | 0.867649  | 1.927439  |
| 40 | 6  | 0 | 5.647004  | 1.852568  | 1.302981  |
| 41 | 6  | 0 | 6.981210  | 1.345236  | 1.254911  |
| 42 | 6  | 0 | 6.980697  | 0.046594  | 1.847700  |
| 43 | 6  | 0 | 5.646738  | -0.248730 | 2.263362  |
| 44 | 1  | 0 | 4.724589  | -2.528103 | -0.230287 |
| 45 | 1  | 0 | 4.726988  | 1.420689  | -2.101907 |
| 46 | 1  | 0 | 7.238423  | -1.966183 | -0.990261 |

S16

|    |   |   |          |           |           |
|----|---|---|----------|-----------|-----------|
| 47 | 1 | 0 | 7.241615 | 0.478527  | -2.136824 |
| 48 | 1 | 0 | 3.754555 | 0.936635  | 2.078983  |
| 49 | 1 | 0 | 5.315495 | 2.804936  | 0.912571  |
| 50 | 1 | 0 | 7.835044 | 1.842169  | 0.815165  |
| 51 | 1 | 0 | 7.833563 | -0.612517 | 1.934413  |
| 52 | 1 | 0 | 5.313136 | -1.168167 | 2.724317  |

-----  
Total Energy (HF) = -1497.9241301 Hartree

DFT Data for BODIPY 6

Standard orientation:

-----

| Center | Atomic | Atomic | Coordinates (Angstroms) |           |           |
|--------|--------|--------|-------------------------|-----------|-----------|
| Number | Number | Type   | X                       | Y         | Z         |
| 1      | 6      | 0      | -5.460810               | 2.564138  | 0.012557  |
| 2      | 1      | 0      | -4.424584               | 2.852398  | -0.091464 |
| 3      | 6      | 0      | -6.568799               | 3.391410  | 0.154553  |
| 4      | 1      | 0      | -6.584648               | 4.471587  | 0.182101  |
| 5      | 6      | 0      | -7.692448               | 2.547205  | 0.266633  |
| 6      | 1      | 0      | -8.734874               | 2.807402  | 0.388840  |
| 7      | 7      | 0      | -7.315803               | 1.259349  | 0.200152  |
| 8      | 5      | 0      | -8.275061               | 0.017267  | 0.192965  |
| 9      | 6      | 0      | -6.591546               | -3.365236 | 0.341806  |
| 10     | 6      | 0      | -5.477963               | -2.554476 | 0.155297  |
| 11     | 1      | 0      | -4.443738               | -2.855148 | 0.067723  |

-----



S17

|    |    |   |           |           |           |
|----|----|---|-----------|-----------|-----------|
| 12 | 6  | 0 | -5.943692 | -1.217452 | 0.112883  |
| 13 | 6  | 0 | -5.241802 | 0.001392  | -0.012869 |
| 14 | 6  | 0 | -5.935559 | 1.229992  | 0.043805  |
| 15 | 7  | 0 | -7.324124 | -1.228884 | 0.269901  |
| 16 | 9  | 0 | -9.106461 | 0.050893  | 1.295762  |
| 17 | 6  | 0 | -7.709480 | -2.508600 | 0.406583  |
| 18 | 1  | 0 | -8.753713 | -2.754646 | 0.541960  |
| 19 | 9  | 0 | -8.993533 | -0.013373 | -0.988765 |
| 20 | 1  | 0 | -6.614696 | -4.442150 | 0.428501  |
| 21 | 6  | 0 | -3.838729 | -0.008005 | -0.171956 |
| 22 | 6  | 0 | -2.627591 | -0.017033 | -0.311107 |
| 23 | 6  | 0 | -1.218891 | -0.028959 | -0.471204 |
| 24 | 6  | 0 | -0.508114 | -1.248994 | -0.499769 |
| 25 | 6  | 0 | -0.498438 | 1.178385  | -0.604139 |
| 26 | 6  | 0 | 0.868757  | -1.260738 | -0.653632 |
| 27 | 1  | 0 | -1.052993 | -2.181938 | -0.399693 |
| 28 | 6  | 0 | 0.878455  | 1.165983  | -0.758553 |
| 29 | 1  | 0 | -1.035921 | 2.120739  | -0.584586 |
| 30 | 6  | 0 | 1.590962  | -0.053656 | -0.785630 |
| 31 | 1  | 0 | 1.406716  | -2.202587 | -0.675155 |
| 32 | 1  | 0 | 1.423696  | 2.098287  | -0.860877 |
| 33 | 6  | 0 | 3.002012  | -0.067037 | -0.941838 |
| 34 | 6  | 0 | 4.211175  | -0.081869 | -1.083039 |
| 35 | 6  | 0 | 5.615299  | -0.103267 | -1.263501 |
| 36 | 26 | 0 | 7.064067  | 0.014448  | 0.227283  |
| 37 | 6  | 0 | 6.457017  | -1.273881 | -1.283669 |

S18

|    |   |   |          |           |           |
|----|---|---|----------|-----------|-----------|
| 38 | 6 | 0 | 6.469173 | 1.039106  | -1.476858 |
| 39 | 6 | 0 | 7.794601 | -0.852984 | -1.521516 |
| 40 | 6 | 0 | 7.802275 | 0.570679  | -1.640590 |
| 41 | 6 | 0 | 6.116493 | 0.202199  | 2.067201  |
| 42 | 6 | 0 | 6.977920 | 1.318118  | 1.843790  |
| 43 | 6 | 0 | 8.308291 | 0.823188  | 1.684506  |
| 44 | 6 | 0 | 8.267871 | -0.598338 | 1.808167  |
| 45 | 1 | 0 | 6.116166 | -2.287946 | -1.130830 |
| 46 | 1 | 0 | 6.138243 | 2.067652  | -1.495510 |
| 47 | 1 | 0 | 8.661065 | -1.497878 | -1.568709 |
| 48 | 1 | 0 | 8.675555 | 1.189569  | -1.792618 |
| 49 | 6 | 0 | 6.912557 | -0.982493 | 2.044252  |
| 50 | 1 | 0 | 5.041510 | 0.242502  | 2.177856  |
| 51 | 1 | 0 | 6.671884 | 2.352976  | 1.776646  |
| 52 | 1 | 0 | 9.186686 | 1.417395  | 1.473090  |
| 53 | 1 | 0 | 9.109884 | -1.269150 | 1.706586  |
| 54 | 1 | 0 | 6.548814 | -1.994643 | 2.155634  |

---

Total energy (HF) = -1574.0776342 Hartree

<sup>1</sup>H NMR of 3

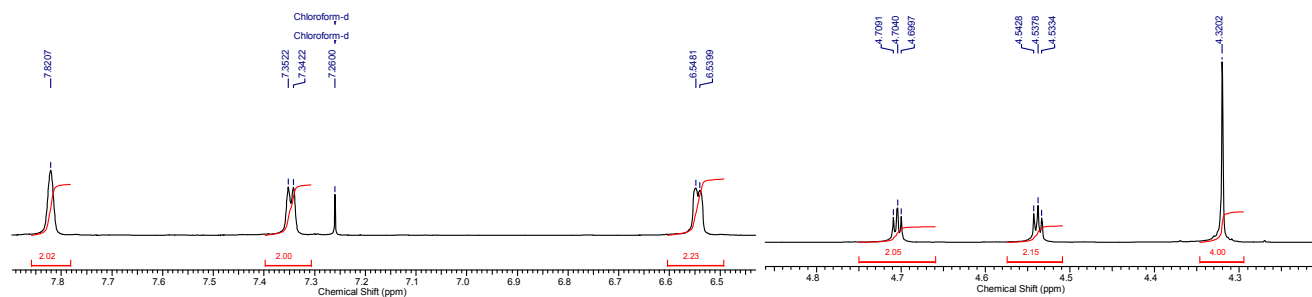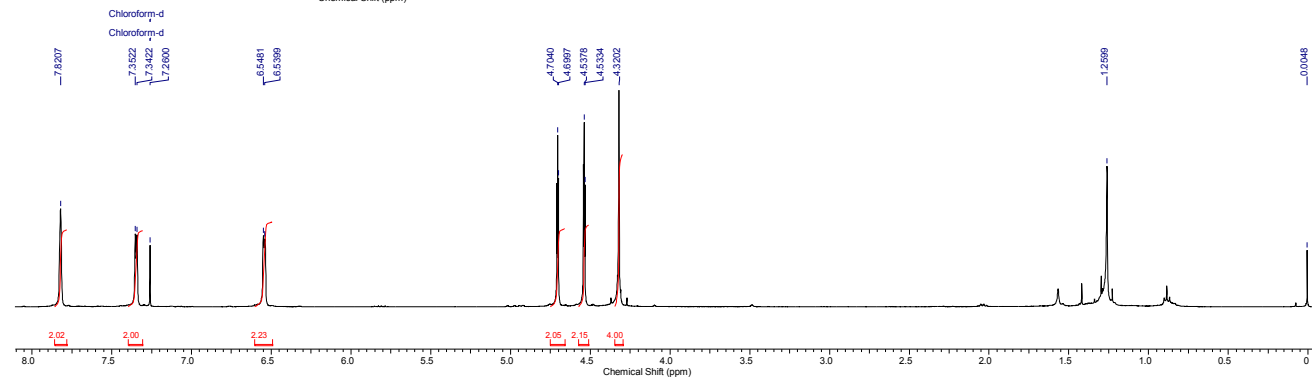

<sup>13</sup>C NMR of 3

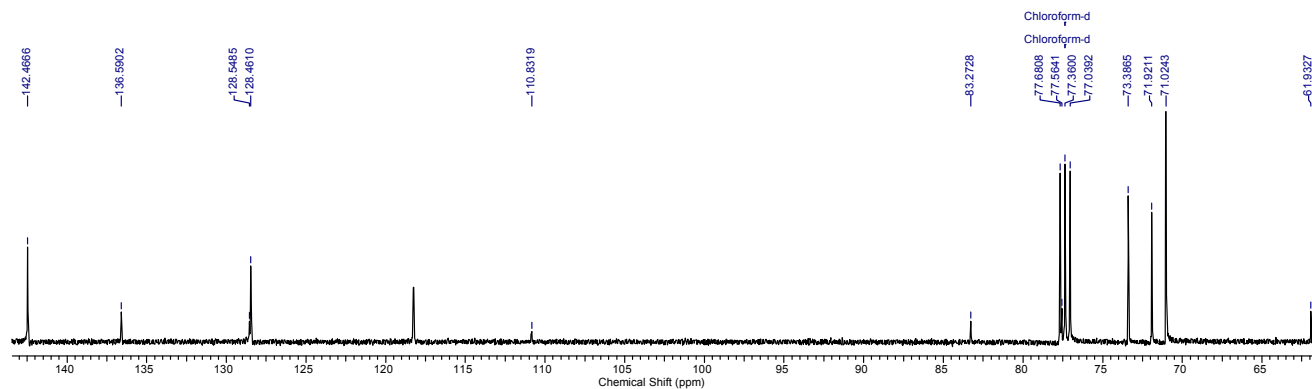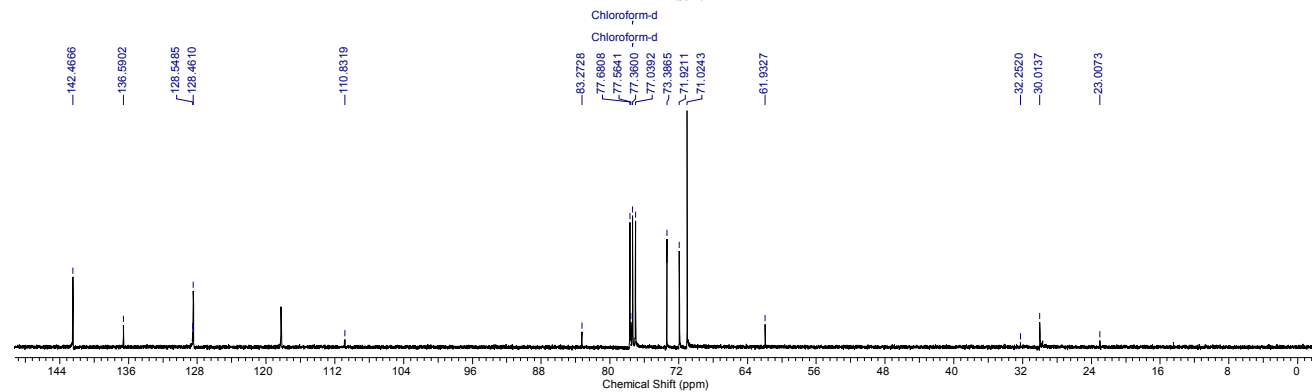

S20

### HRMS of 3

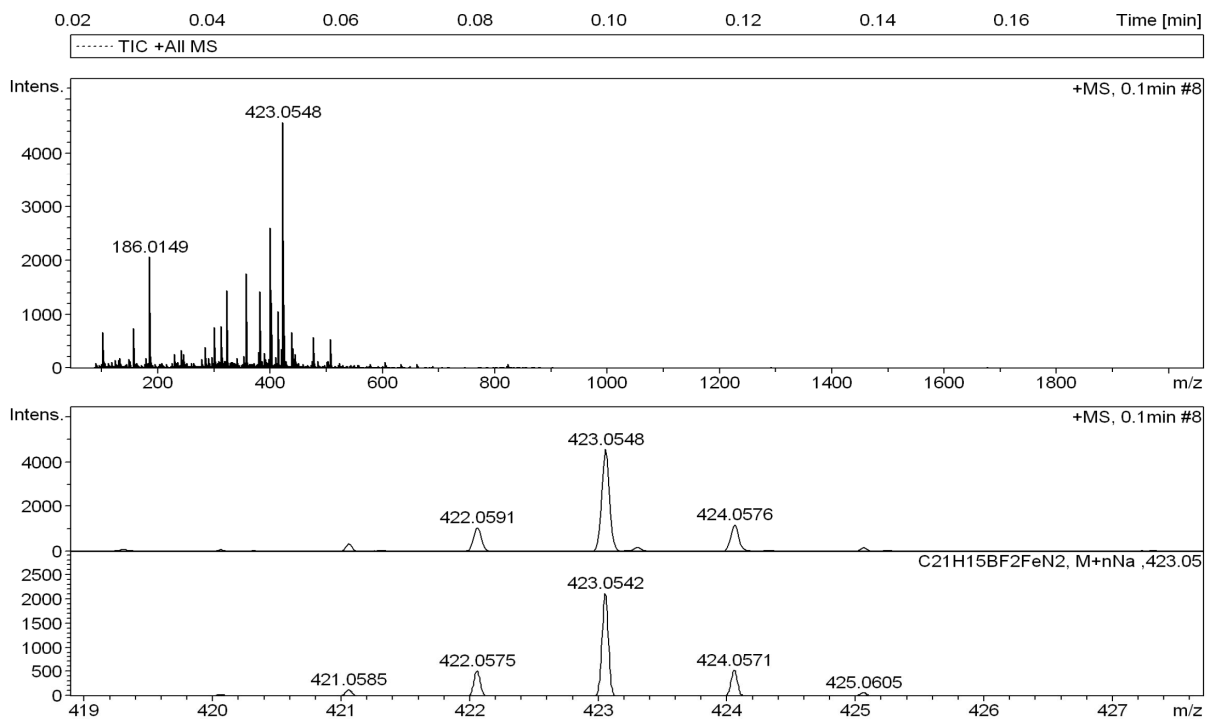

Bruker Compass DataAnalysis 4.0

printed: 2/14/2013 6:09:22 PM

Page 1 of 1

### <sup>1</sup>H NMR of 4

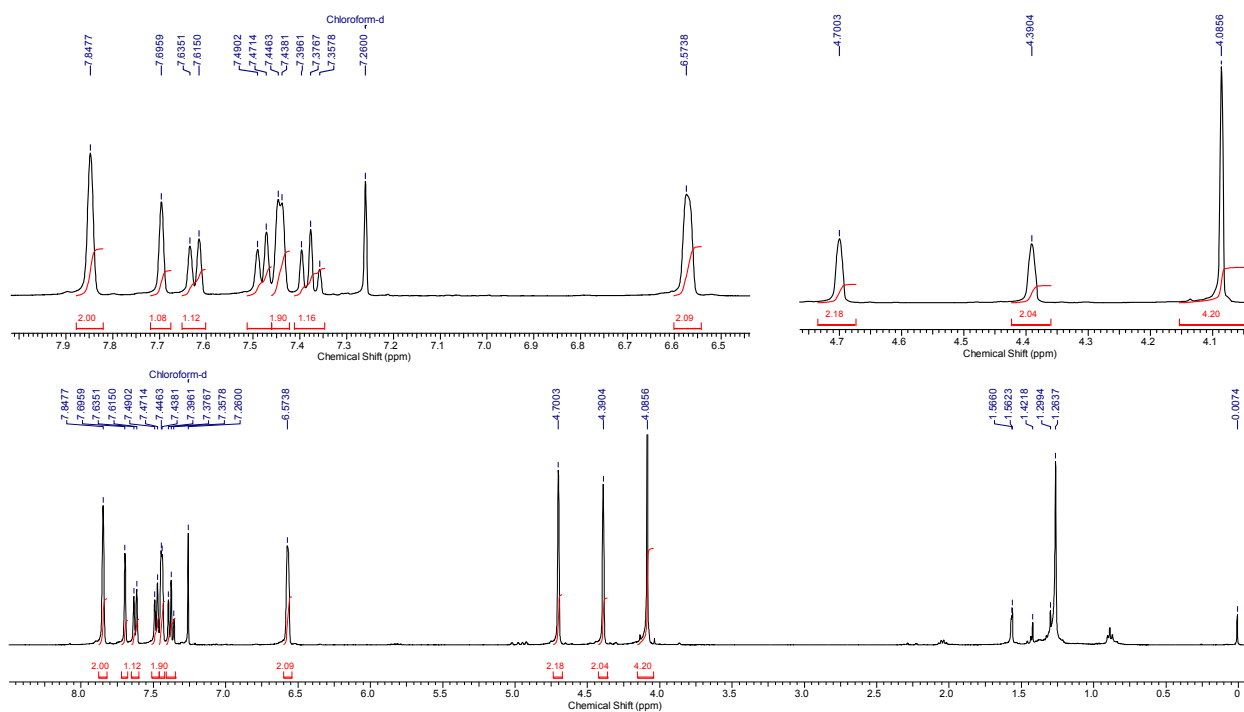

S21

$^{13}\text{C}$  NMR of 4

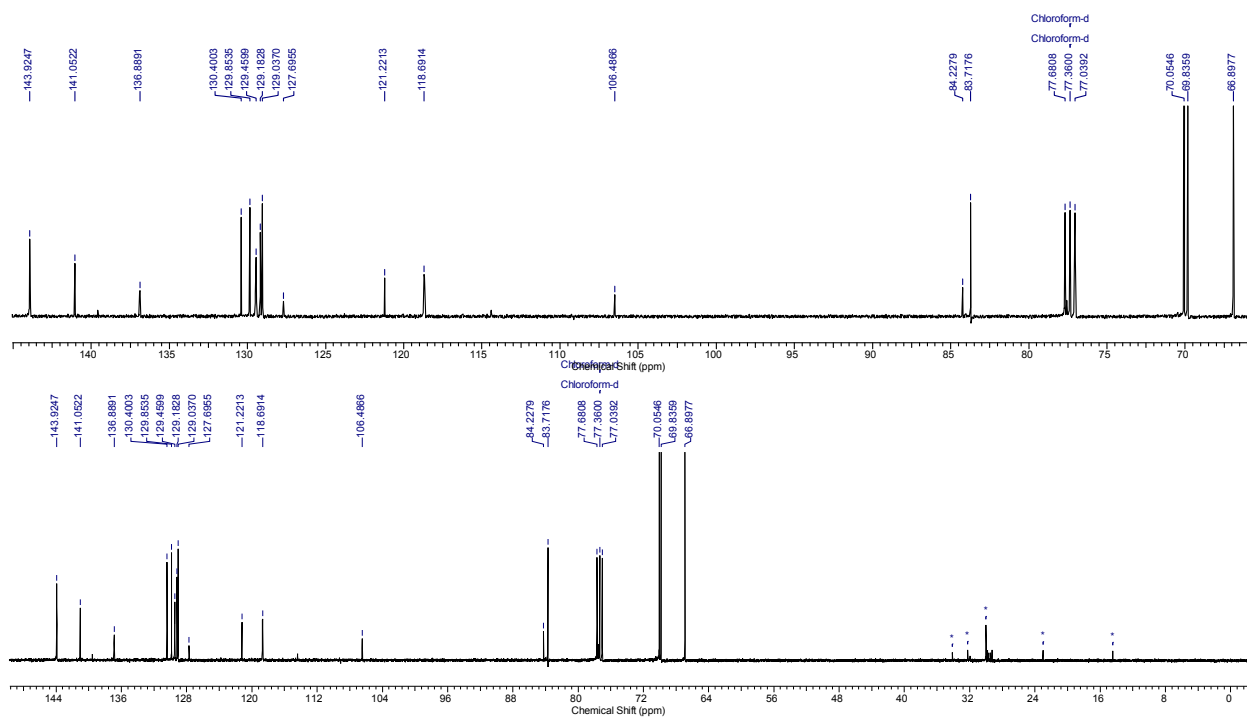

HRMS of 4

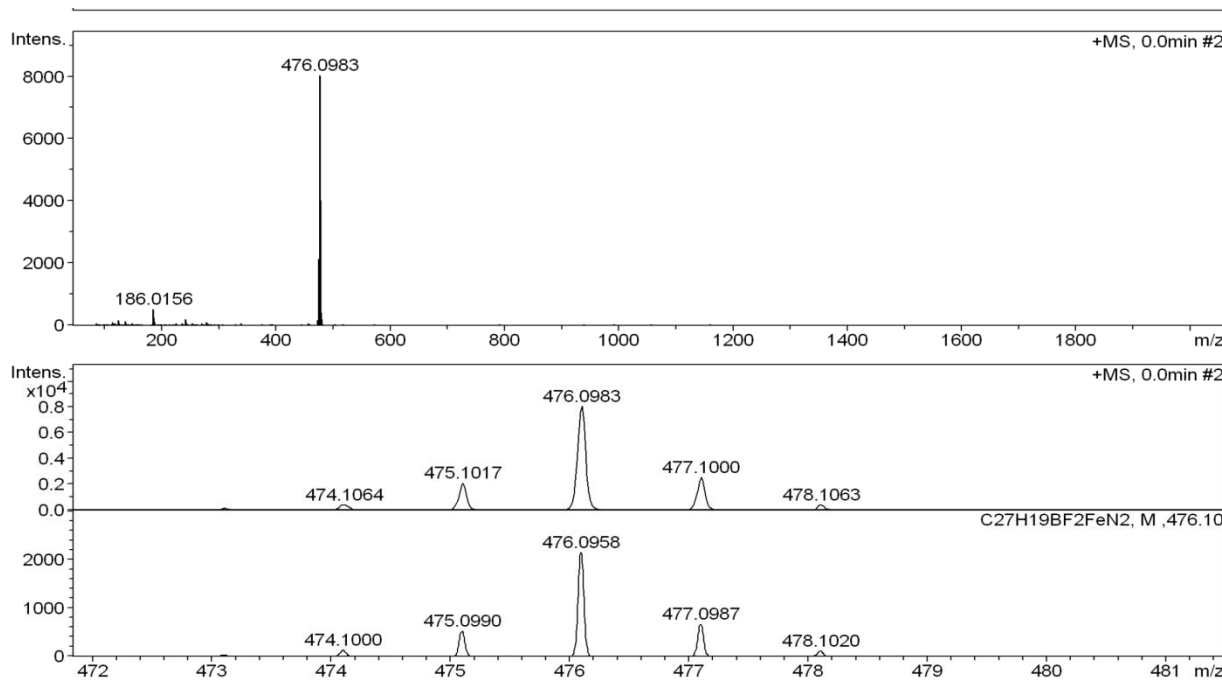

### $^1\text{H}$ NMR of 5

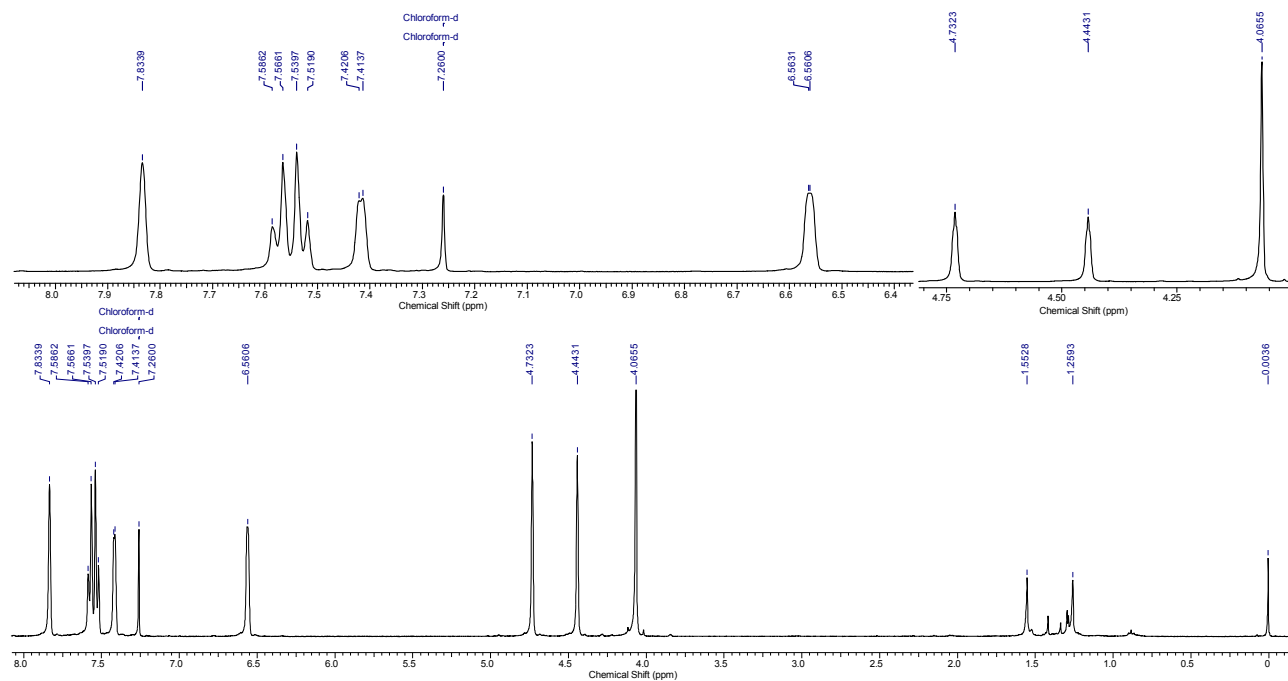

### $^{13}\text{C}$ NMR of 5

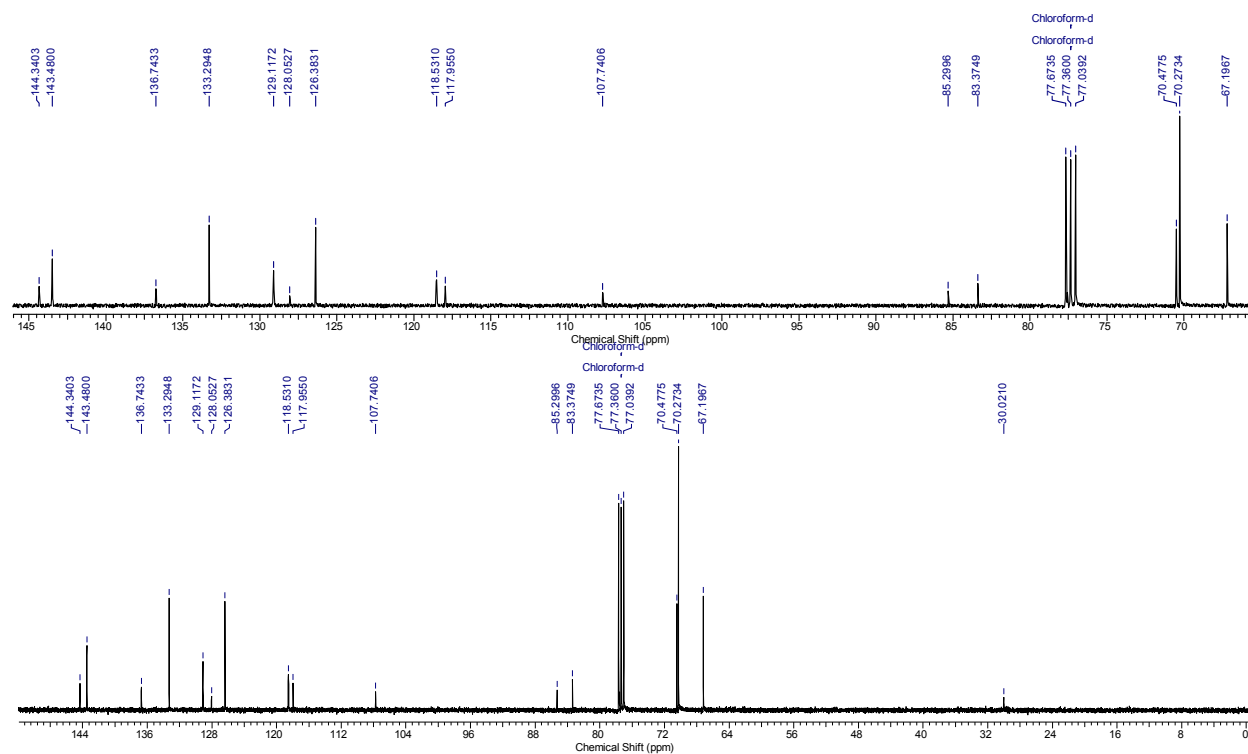

### HRMS of 5

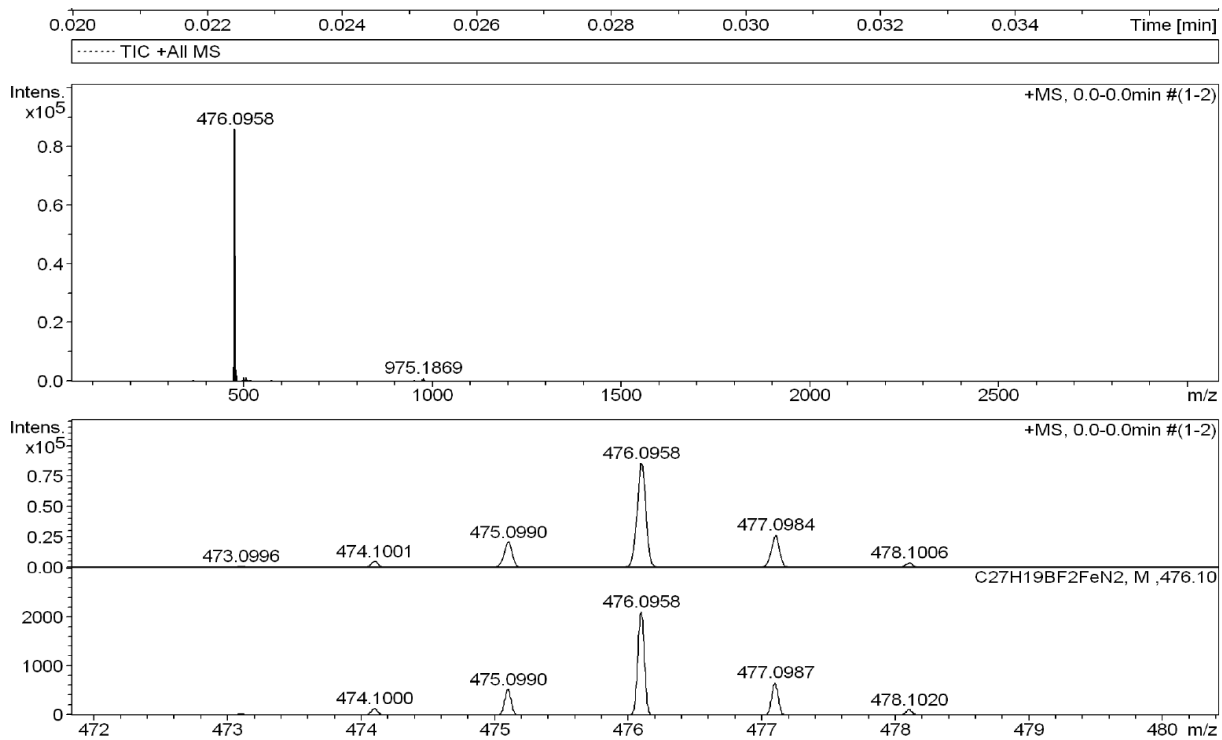

### <sup>1</sup>H NMR of 6

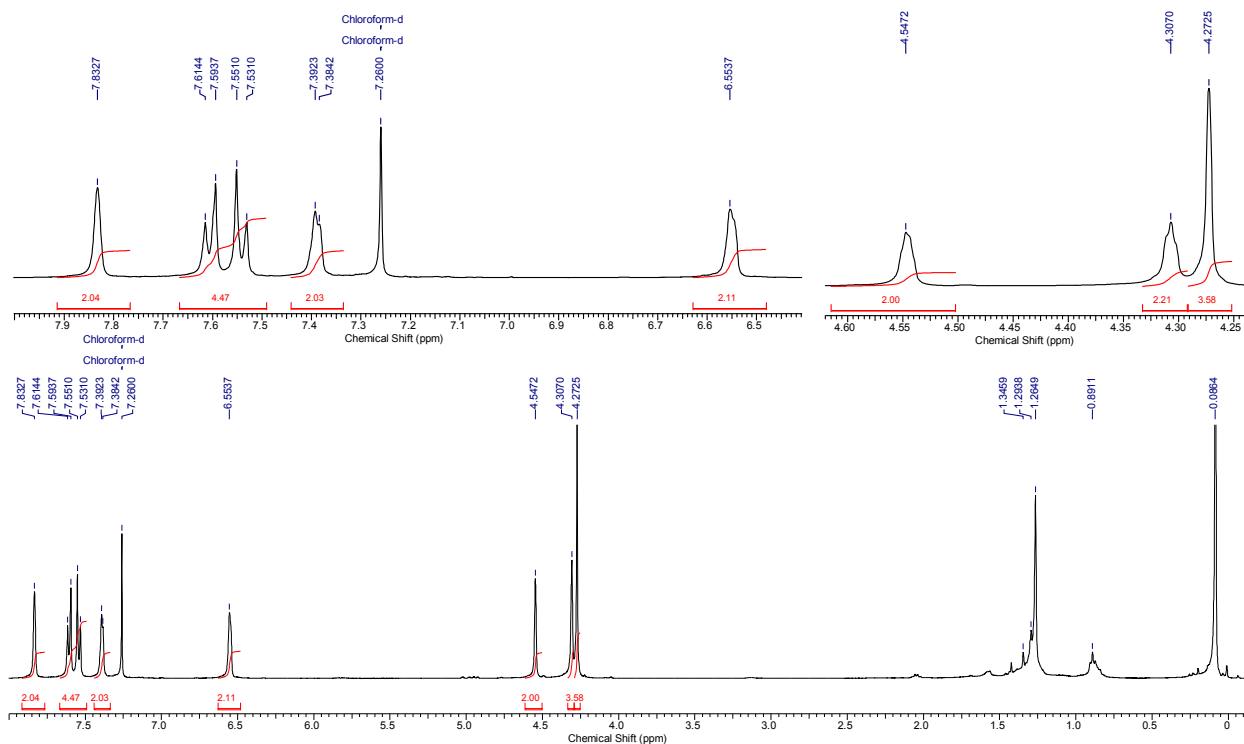

S24

$^{13}\text{C}$  NMR of 6

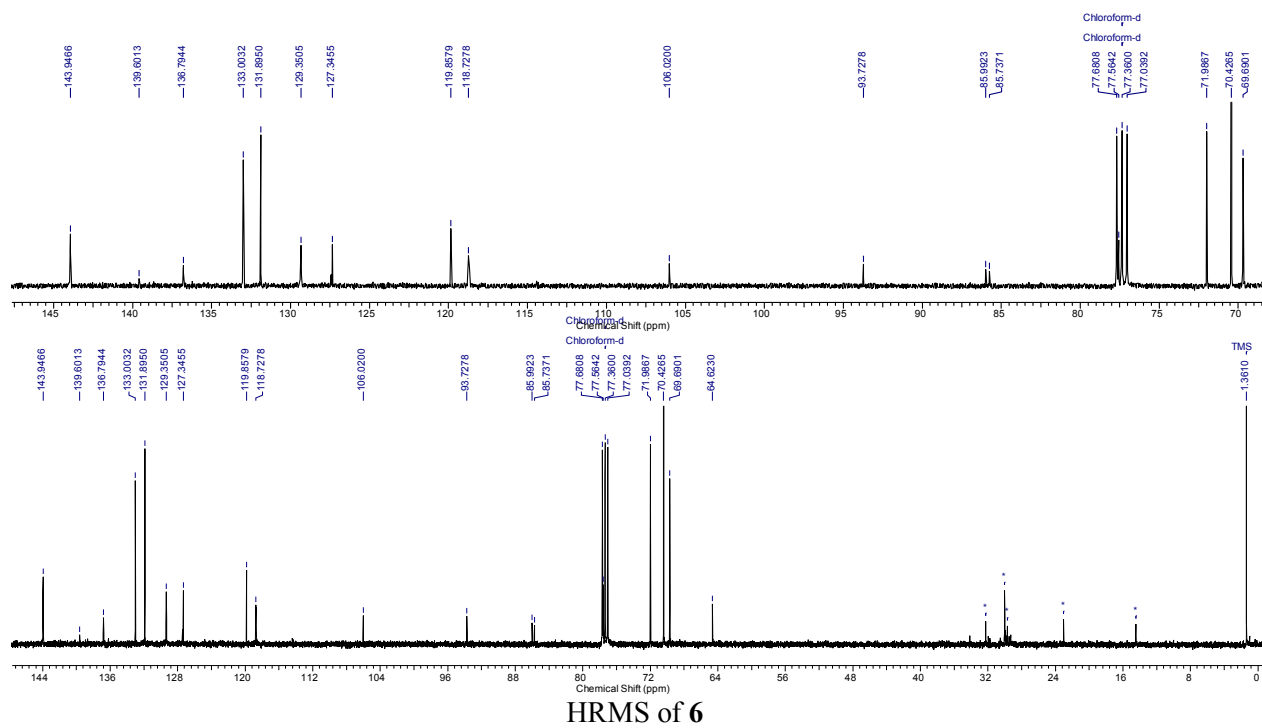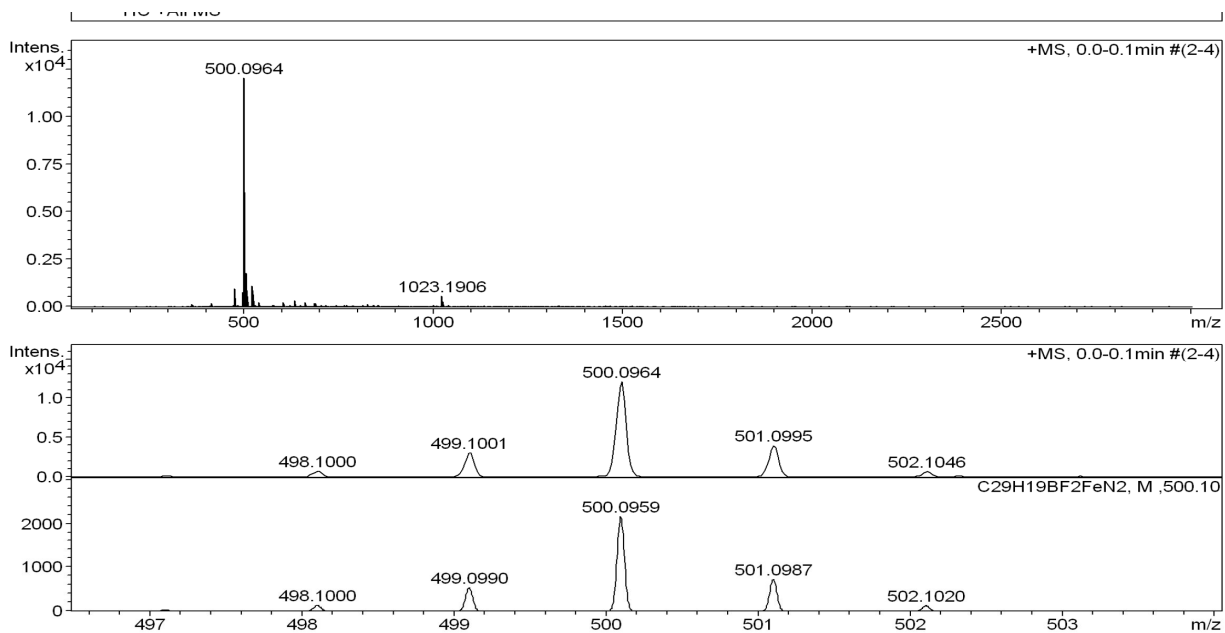



## References:

---

- (i) Zhang, R.; Wang, Z.; Wu Y.; Fu H.; Yao J. *Org. Lett.* **2008**, *14*, 3065.
- (ii) Gaussian 09, Revision A.02, M. J. Frisch, G. W. Trucks, H. B. Schlegel, G. E. Scuseria, M. A. Robb, J. R. Cheeseman, G. Scalmani, V. Barone, B. Mennucci, G. A. Petersson, H. Nakatsuji, M. Caricato, X. Li, H. P. Hratchian, A. F. Izmaylov, J. Bloino, G. Zheng, J. L. Sonnenberg, M. Hada, M. Ehara, K. Toyota, R. Fukuda, J. Hasegawa, M. Ishida, T. Nakajima, Y. Honda, O. Kitao, H. Nakai, T. Vreven, J. A. Montgomery, Jr., J. E. Peralta, F. Ogliaro, M. Bearpark, J. J. Heyd, E. Brothers, K. N. Kudin, V. N. Staroverov, R. Kobayashi, J. Normand, K. Raghavachari, A. Rendell, J. C. Burant, S. S. Iyengar, J. Tomasi, M. Cossi, N. Rega, J. M. Millam, M. Klene, J. E. Knox, J. B. Cross, V. Bakken, C. Adamo, J. Jaramillo, R. Gomperts, R. E. Stratmann, O. Yazyev, A. J. Austin, R. Cammi, C. Pomelli, J. W. Ochterski, R. L. Martin, K. Morokuma, V. G. Zakrzewski, G. A. Voth, P. Salvador, J. J. Dannenberg, S. Dapprich, A. D. Daniels, O. Farkas, J. B. Foresman, J. V. Ortiz, J. Cioslowski, and D. J. Fox, Gaussian, Inc., Wallingford CT, 2009.
- (iii) (a) Becke, A. D. *J. Chem. Phys.* **1993**, *98*, 5648-5652; (b) Lee, C. T.; Yang, W. T.; Parr, R. G. *Phys. Rev. B* **1988**, *37*, 785-789; (c) Hay, P. J.; Wadt, W. R. *J. Chem. Phys.* **1985**, *82*, 270-283; (d) Francl, M. M.; Pietro, W. J.; Hehre, W. J.; Binkley, J. S.; Gordon, M.S.; Defrees, D. J.; Pople, J. A. *J. Chem. Phys.* **1982**, *77*, 3654-3665.
